# Supplementary material
Source: publisher figshare collection journal article supplement (https://geolsoc.figshare.com/ndownloader/files/5420912)
Supplement: Supplementary file 1 [file 5420912]

Table 1 Stable isotope data
Sample Number	Description, locality	UTM Square	Easting	Northing	Lat	Long	Altitude	GPS Waypoint	Comments	Absolute	Weathering (Fresh. Moderate, bad)	Calcite / Dolomite	weight (mg)	height above base (m)		weight loaded (mg)	?13C Corrected	?18O Corrected		replicate loaded (mg)	?13C Corrected	?18O Corrected		?13C average	?18O average	?13C S.D.	?18O S.D.
SJ-17a	dolomite (turbiditic layer)	18L	484864	8296667	15.40686657	-75.14106036	15	158		367	fresh	calcite	18.822	367.0		0.600	0.068	-17.203		0.686	0.139	-17.123		0.104	-17.163	0.025	0.028
SJ-17b	dolomite (turbiditic layer)	18L	484864	8296667	15.40686657	-75.14106036	15	158		367	fresh	calcite	23.678	367.0		0.715	0.059	-17.050						0.059	-17.050
SJ-18a	dolomite (turbiditic layer)	18L	484864	8296667	15.40686657	-75.14106036	15	158		368	fresh	calcite	8.350	368.0		0.636	-0.322	-16.660		0.570	-0.148	-16.543		-0.235	-16.602	0.061	0.041
SJ-18b	dolomite (turbiditic layer)	18L	484864	8296667	15.40686657	-75.14106036	15	158		368	fresh	calcite	13.965	368.0		0.693	-0.176	-17.303						-0.176	-17.303
SJ-19a	dolomite clast	18L	484855	8296664	15.40689363	-75.14114425	18	159		379	fresh	calcite	17.363	379.0		0.657	-0.084	-14.846		0.682	-0.074	-14.921		-0.079	-14.883	0.004	0.027
SJ-19 b	dolomite clast	18L	484855	8296664	15.40689363	-75.14114425	18	159		379	fresh	calcite	15.274	379.0		0.649	0.013	-14.679						0.013	-14.679
SJ-23	dolomite	18L	484840	8296654	15.40698395	-75.14128411	9	161	15	397.85	weathered	calcite	18.230	397.9		0.726	-1.955	-8.154		0.611	-1.914	-8.230		-1.935	-8.192	0.014	0.027
SJ-24c	dolomite	18L	484840	8296654	15.40698395	-75.14128411	9	161	80	397.2	weathered	dolomite	11.110	397.2		1.017	-1.550	-8.600		0.975	-1.534	-8.530		-1.542	-8.565	0.006	0.025
SJ-25	dolomite	18L	484840	8296654	15.40698395	-75.14128411	9	161	140	396.6	weathered	dolomite	26.840	396.6		1.003	-2.610	-6.452		5.064	-2.296	-5.596		-2.296	-5.596
SJ-26	dolomite	18L	484840	8296654	15.40698395	-75.14128411	9	161	180	396.2	weathered	dolomite	8.538	396.2		1.038	-2.461	-10.313		1.536	-2.373	-10.249		-2.417	-10.281	0.031	0.022
SJ-27	dolomite	18L	484840	8296654	15.40698395	-75.14128411	9	161	190	396.1	moderate	dolomite	20.186	396.1		1.112	-2.489	-10.336		0.870	-2.483	-10.381		-2.486	-10.358	0.002	0.016
SJ-28	dolomite	18L	484840	8296654	15.40698395	-75.14128411	9	161	300	395	moderate	dolomite	9.534	395.0		0.948	-2.544	-10.571		1.568	-2.550	-10.534		-2.547	-10.552	0.002	0.013
SJ-29	dolomite	18L	484840	8296654	15.40698395	-75.14128411	9	161	300	395	moderate	dolomite	7.300	395.0		1.088	-2.455	-10.809		0.867	-2.508	-10.664		-2.481	-10.737	0.019	0.051
SJ-30	dolomite	18L	484840	8296654	15.40698395	-75.14128411	9	161	330	394.7	moderate	dolomite	10.022	394.7		1.065	-2.468	-10.526		1.489	-2.490	-10.412		-2.479	-10.469	0.008	0.040
SJ-31	dolomite	18L	484840	8296654	15.40698395	-75.14128411	9	161	360	394.4	moderate	dolomite	25.151	394.4		1.086	-2.490	-10.747		1.013	-2.512	-10.544		-2.501	-10.645	0.008	0.072
SJ-33	dolomite	18L	484840	8296654	15.40698395	-75.14128411	9	161	500	393	moderate	dolomite	20.725	393.0		1.049	-2.410	-11.330		1.481	-2.347	-11.737		-2.378	-11.534	0.022	0.144
SJ-34	dolomite	18L	484840	8296654	15.40698395	-75.14128411	9	161	420	393.8	weathered	dolomite	7.888	393.8		1.042	-2.479	-10.785		0.912	-2.494	-10.798		-2.486	-10.791	0.005	0.005
SJ-35	dolomite	18L	484840	8296654	15.40698395	-75.14128411	9	161	550	392.5	moderate	dolomite	18.420	392.5		1.113	-2.313	-11.564		1.467	-2.282	-11.747		-2.297	-11.655	0.011	0.065
SJ-36	dolomite	18L	484840	8296654	15.40698395	-75.14128411	9	161	650	391.5	moderate	dolomite	10.446	391.5		0.997	-2.171	-12.053		1.048	-2.155	-12.004		-2.163	-12.029	0.006	0.017
SJ-37	dolomite	18L	484840	8296654	15.40698395	-75.14128411	9	161	690	391.1	moderate	dolomite	14.666	391.1		1.525	-2.189	-11.350						-2.189	-11.350
SJ-38	dolomite	18L	484840	8296654	15.40698395	-75.14128411	9	161	950	388.5	moderate	dolomite	10.987	388.5		0.979	-1.553	-12.857		0.870	-1.590	-12.804		-1.572	-12.831	0.013	0.019
SJ-39	dolomitic clast	18L	484850	8296654	15.40698401	-75.14119091	10	164		383	moderate	dolomite	9.416	383.0		1.015	2.682	-12.011		0.876	2.616	-11.925		2.649	-11.968	0.023	0.030
SJ-40	dolomite	18L	484840	8296654	15.40698395	-75.14128411	9	161	150	396.5	moderate	dolomite	9.350	396.5		0.933	-2.261	-10.212		0.943	-2.294	-10.396		-2.277	-10.304	0.012	0.065
SJ-41	massive beige dolomite	18L	484840	8296654	15.40698395	-75.14128411	9	161	-470	402.7	v. weathered	dolomite	6.797	402.7		1.110	2.363	-5.040		0.951	2.282	-4.457		2.322	-4.749	0.029	0.206
SJ-42	massive beige dolomite	18L	484840	8296654	15.40698395	-75.14128411	9	161	-1990	417.9	weathered	dolomite	18.869	417.9		1.028	0.349	-5.061		1.557	0.410	-4.913		0.379	-4.987	0.022	0.052
SJ-43	massive beige dolomite	18L	484840	8296654	15.40698395	-75.14128411	9	161	-1720	415.2	weathered	dolomite	11.440	415.2		1.072	0.842	-5.478		0.858	0.848	-5.574		0.845	-5.526	0.002	0.034
SJ-44	massive beige dolomite	18L	484347	8298233	15.39270544	-75.14586868	9	166			moderate	dolomite	18.371	700.0		1.047	0.932	-8.093						0.932	-8.093
SJ-45	massive beige dolomite	18L	484229	8298238	15.39265951	-75.14696827	-11	167			fresh	dolomite	9.869	777.0		1.069	2.461	-8.478						2.461	-8.478
SJ-46	beige dolomite	18L	484029	8298433	15.3908953	-75.14883079	26	170			moderate	dolomite	11.858	936.0		0.930	1.726	-8.137						1.726	-8.137
SJ-49	laminated dol / mudstone	18L	483829	8298574	15.38961928	-75.15069363	35	171			fresh	calcite	9.730	1093.0		0.620	-7.825	-12.785		0.704	-7.903	-12.756		-7.864	-12.771	0.028	0.010
SJ-50	beige dolomite	18L	483800	8298552	15.389818	-75.15096402	22	173			moderate	calcite	24.869	1105.0		0.699	-6.468	-10.193						-6.468	-10.193
SJ-51	beige dolomite	18L	483801	8298398	15.3912103	-75.15095571	8	174			moderate	calcite	15.522	1111.0		0.707	-5.947	-10.657						-5.947	-10.657
SJ-52	laminated dolomite	18L	483801	8298398	15.3912103	-75.15095571	8	174			fresh	dolomite	10.612	1111.0		0.962	-6.443	-8.836						-6.443	-8.836
SJ-53	laminated dolomite	18L	483562	8298273	15.39233889	-75.15318373	6	176			moderate	calcite	19.028	1234.0		0.729	-4.867	-10.467		0.622	-4.943	-10.491		-4.905	-10.479	0.027	0.009
SJ-54	massive grey coarse dolomite	18L	483378	8298261	15.39244619	-75.15489848	40	178			moderate	dolomite	15.756	1359.0		1.064	2.625	-8.920						2.625	-8.920
SJ-58	massive clean dolomite	18L	482985	8298369	15.3914672	-75.15856005	10	185			fresh	dolomite	14.710	1625.0		1.122	1.186	-7.166						1.186	-7.166
SJ-63	massive grey fractured dolomite	18L	482434	8299975	15.37694382	-75.16368337	32	195			moderate	dolomite	11.666	1992.0		1.078	1.193	-8.517						1.193	-8.517
SJ-64	massive grey fractured dolomite	18L	482306	8300360	15.3734622	-75.16487336	24	197			weathered	dolomite	9.513	2065.0		0.941	0.822	-4.236						0.822	-4.236
38 samples and 26 replicate analyses
